# Supplementary material
Source: PubMed Central journal article supplement (PMC6997082)

## On-line Supplementary Material

**Title:** High glycemic index and glycemic load diets as risk factors for insomnia: Analyses from the Women's Health Initiative

**Authors:** James E. Gangwisch, Lauren Hale, Marie-Pierre St-Onge, Lydia Choi, Erin S. LeBlanc, Dolores Malaspina, Mark G. Opler, Aladdin H. Shadyab, James M. Shikany, Linda Snetselaar, Oleg Zaslavsky, Dorothy Lane

### Supplementary Figure 1.

#### Participant Flow Diagram

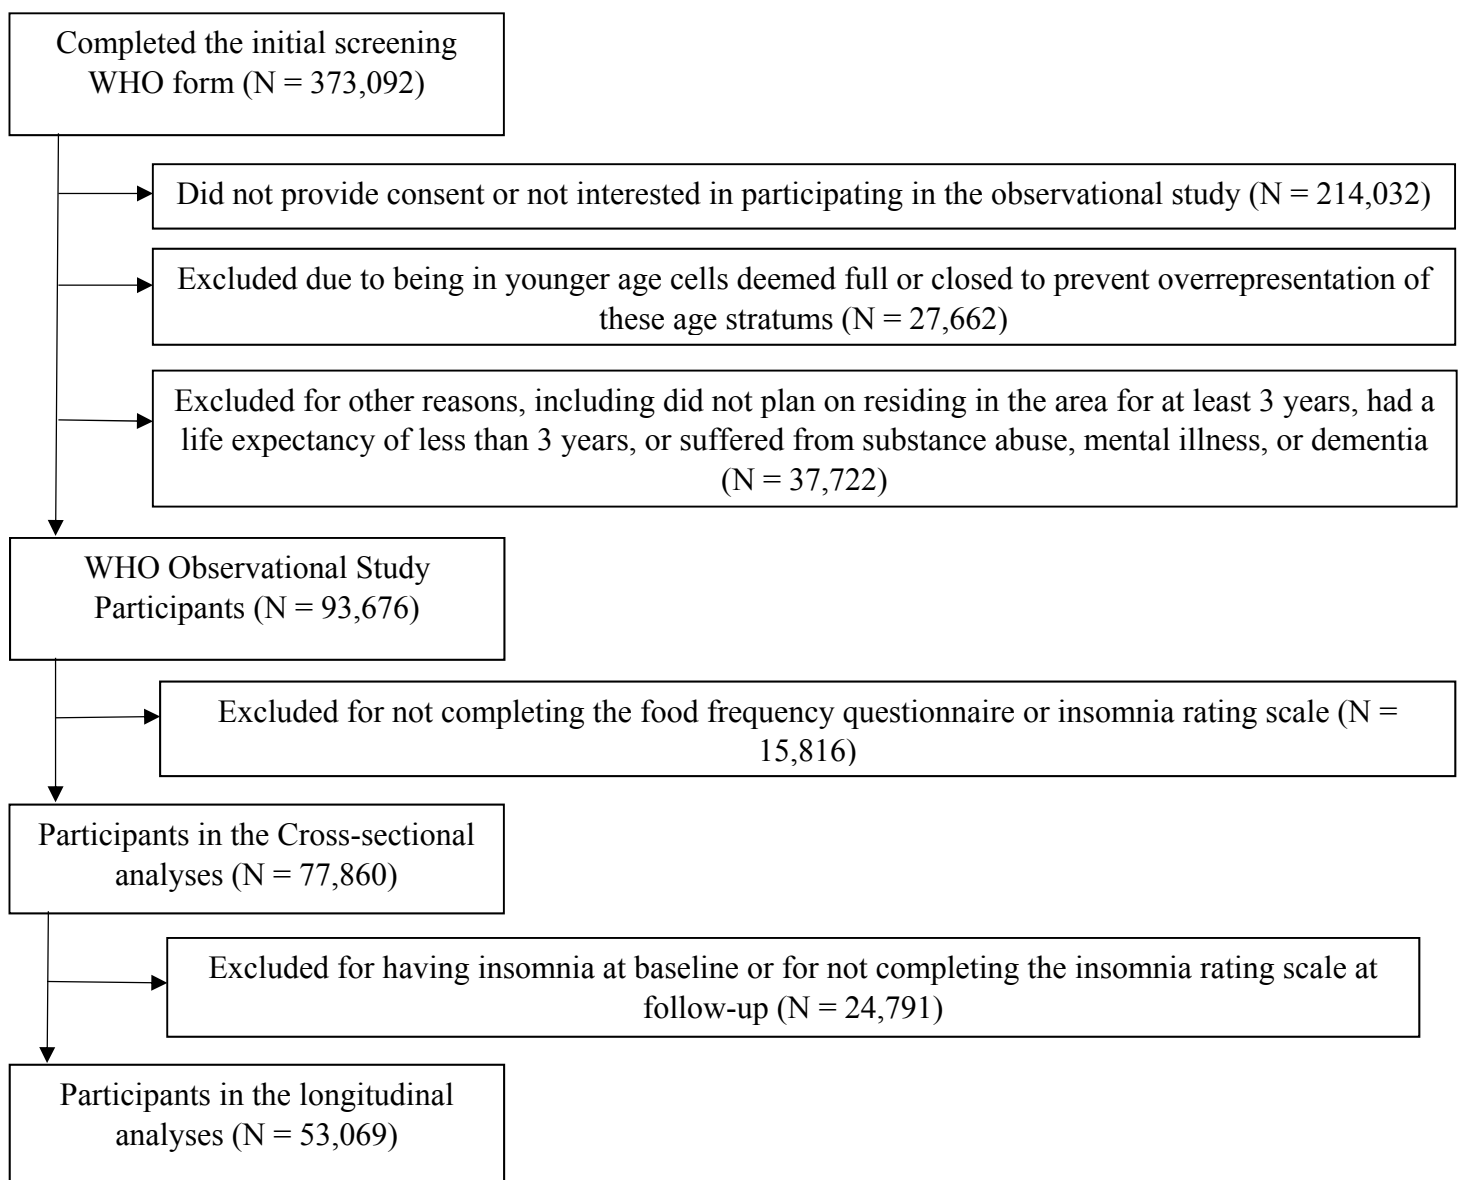

Supplement: nqz275_supplemental_file.pdf [file nqz275_supplemental_file.pdf]
